# Supplementary material
Source: PubMed Central journal article supplement (PMC2396893)
Supplement: JCI0831244sd.pdf [file JCI0831244sd.pdf]

Supplemental Fig 1

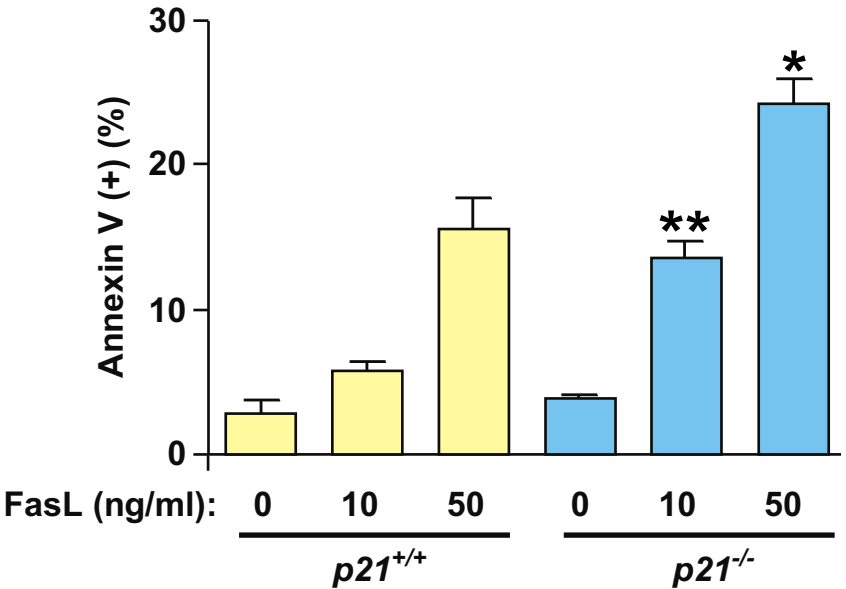

**A**

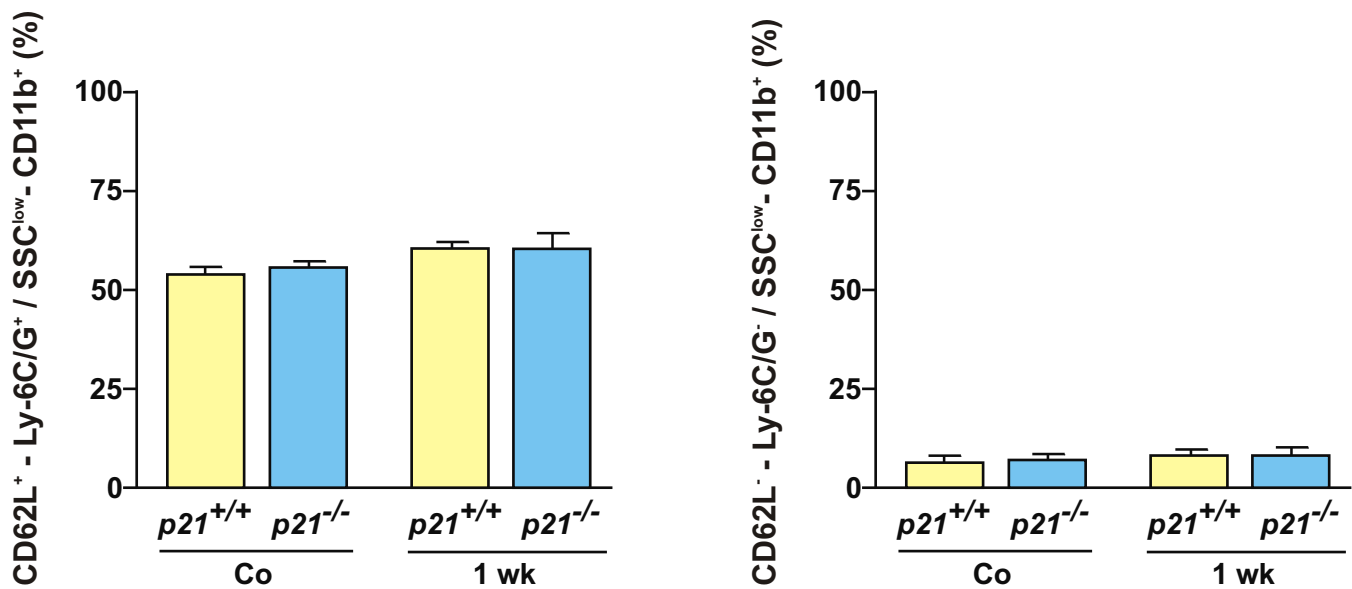

**B**

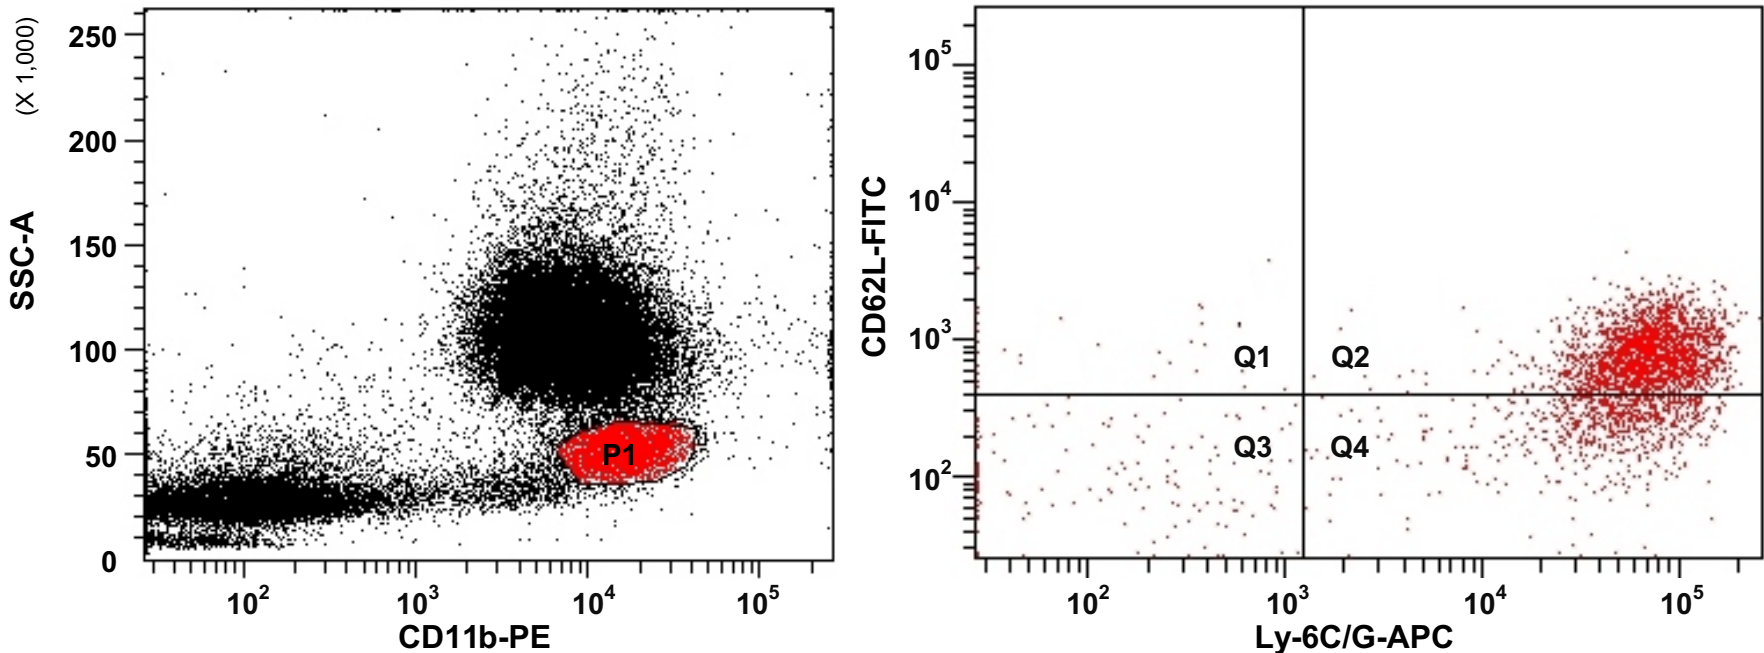

**A**

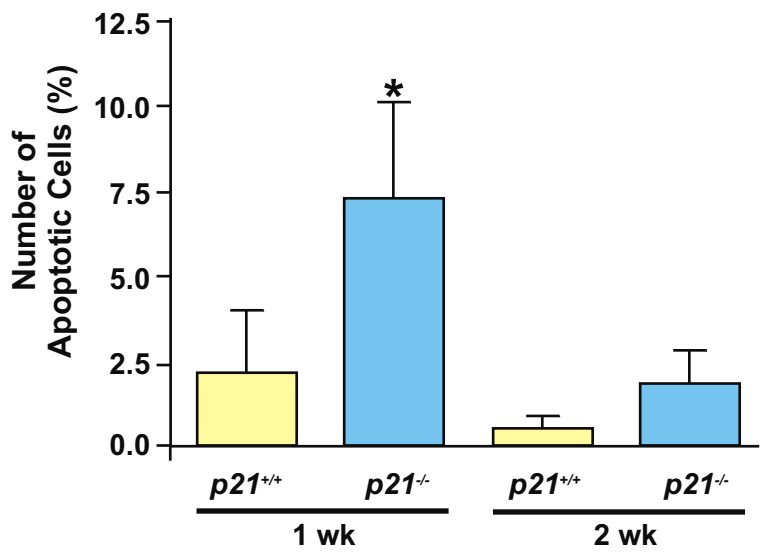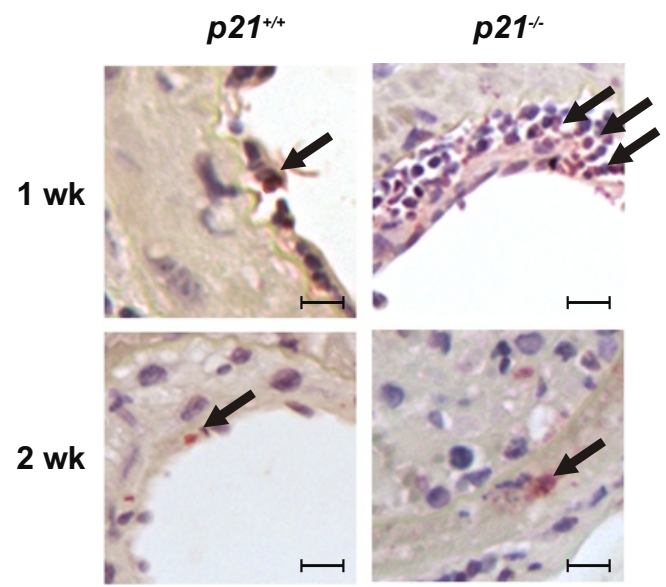

**B**

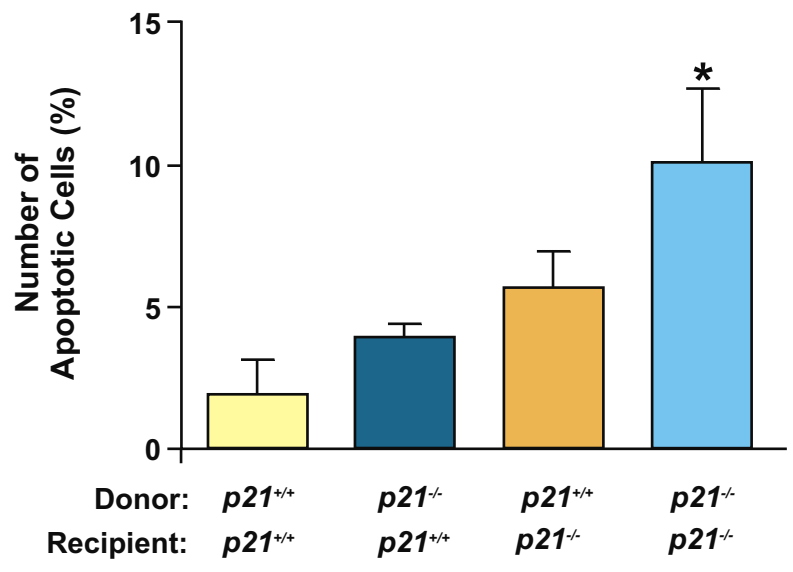

Supplemental Fig 4

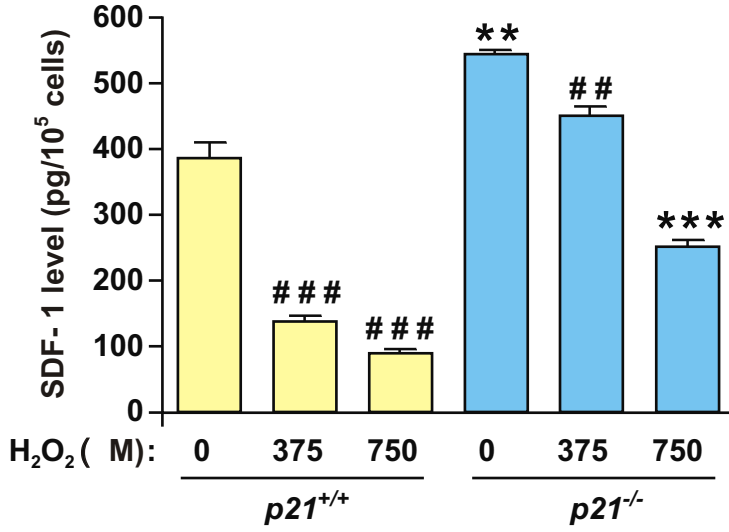

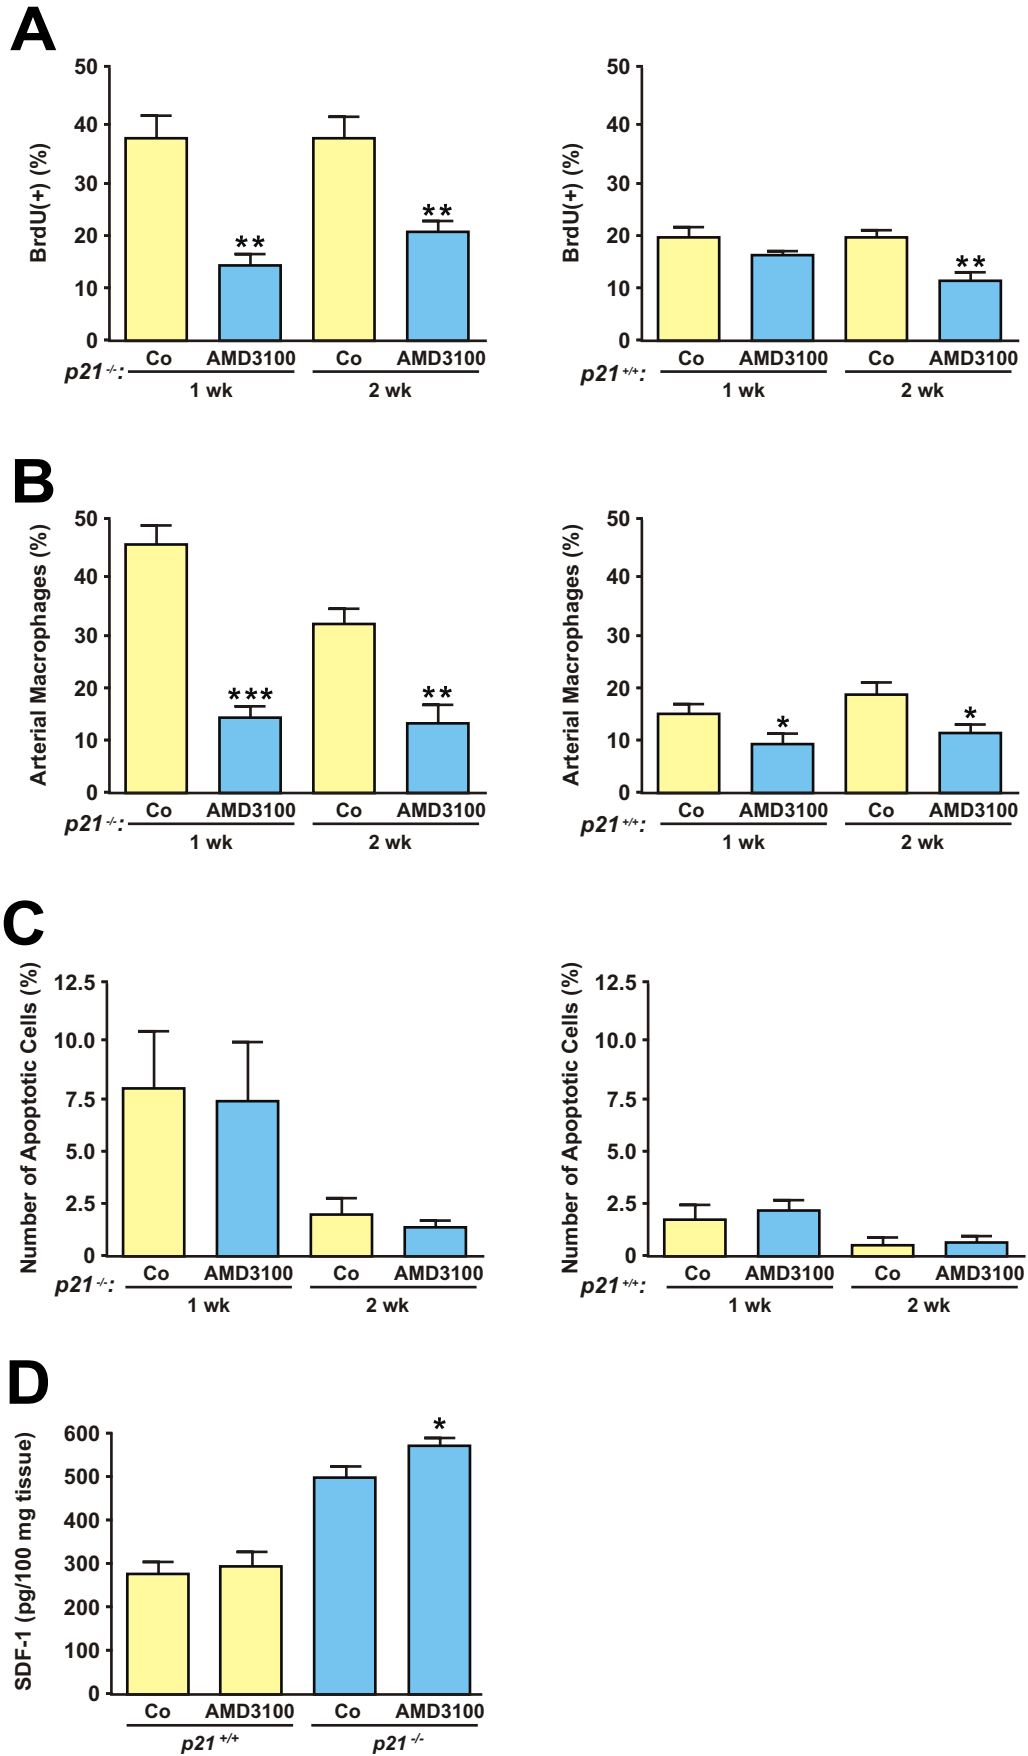

### **Supplemental Figure legends:**

**Supplemental Figure 1: Accelerated apoptosis in  $p21^{-/-}$  VSMCs in vitro.**  $p21^{-/-}$  VSMCs in culture (blue bars) displayed increased apoptosis compared to  $p21^{+/+}$  VSMCs (yellow bars) with in vitro administration of 0, 10 or 50 ng / ml of FasL ( $n=3$ ; \* $P < 0.05$ , \*\* $P < 0.01$  for comparison of  $p21^{-/-}$  to  $p21^{+/+}$  at identical FasL doses).

**Supplemental Figure 2: Immunophenotyping of peripheral blood before and after wire vascular injury in  $p21^{+/+}$  and  $p21^{-/-}$  mice.** (A) Peripheral blood leukocytes were isolated and stained with CD11b-PE, Ly-6C/G-APC and CD62L-FITC and the percentages of Ly-6C/G<sup>+</sup>/CD62L<sup>+</sup> and Ly-6C/G<sup>-</sup>/CD62L<sup>-</sup> monocytes were determined ( $n=3$ ). (B) Representative dot blots. Left: acquisition of the side scatter-A (SSC-A) vs. CD11b-PE. P1 represents the gated CD11b-PE positive SSC-A low cells. Right: acquisition of Ly-6C/G-APC and CD62L-FITC cells present in the CD11b-PE population. No differences were observed between  $p21^{+/+}$  and  $p21^{-/-}$  mice.

**Supplemental Figure 3: Cell apoptosis in injured arteries from  $p21^{+/+}$  and  $p21^{-/-}$  mice.** (A) Left panel: percentage of apoptotic cells in arteries from  $p21^{+/+}$  and  $p21^{-/-}$  mice 1 and 2 weeks after vascular injury ( $n=5$ ; \* $P < 0.05$   $p21^{+/+}$  vs.  $p21^{-/-}$  1 wk). Right panel: TUNEL staining of the arteries following vascular injury in  $p21^{-/-}$  and  $p21^{+/+}$  mice 1 and 2 weeks after injury. Arrows indicate apoptotic cells. Scale bar = 7  $\mu$ m. (B) One week after femoral artery wire injury, the number of TUNEL positive cells was decreased in arterial tissue from  $p21^{+/+}$  mice receiving  $p21^{+/+}$  BM compared to  $p21^{-/-}$  mice receiving

$p21^{-/-}$  BM ( $n=5$ ;  $*P < 0.05$ ). No other between group comparisons reached statistical significance.

**Supplement Figure 4: SDF-1 levels are decreased in  $p21^{-/-}$  and  $p21^{+/+}$  VSMCs upon oxidative stress.** Increased SDF-1 levels were observed in  $p21^{-/-}$  compared to  $p21^{+/+}$  VSMCs prior to oxidative stress. The induction of oxidative stress, with 375 or 750  $\mu\text{M}$  of  $\text{H}_2\text{O}_2$ , caused a reduction in SDF-1 levels in both  $p21^{-/-}$  (blue bars) and  $p21^{+/+}$  (yellow bars) VSMCs ( $n=3$ ;  $**P < 0.01$  vs.  $p21^{+/+}$  0  $\mu\text{M}$ ,  $^{##}P < 0.01$  vs.  $p21^{-/-}$  0  $\mu\text{M}$ ,  $^{***}P < 0.001$  vs.  $p21^{-/-}$  0  $\mu\text{M}$ ,  $^{###}P < 0.001$  vs.  $p21^{+/+}$  0  $\mu\text{M}$ ).

**Supplement Figure 5: SDF-1 inhibition induced by AMD3100 administration prevents excessive proliferation during vascular wound repair.** (A) AMD3100 treatment decreased cellular proliferation as assessed by BrdU incorporation at 1 and 2 weeks after vascular injury in  $p21^{-/-}$  arteries and at 2 weeks after vascular injury in  $p21^{+/+}$  arteries (left:  $n=4$ ;  $**P < 0.01$  vs.  $p21^{-/-}$  1 wk;  $**P < 0.01$  vs.  $p21^{-/-}$  2 wk), (right:  $n=4$ ;  $**P < 0.01$  vs.  $p21^{+/+}$  2 wk). (B) AMD3100 treatment reduced the number of local arterial macrophages in  $p21^{-/-}$  and  $p21^{+/+}$  arteries at 1 and 2 weeks after vascular injury (left:  $n=5$ ;  $^{***}P < 0.001$  vs.  $p21^{-/-}$  1 wk;  $**P < 0.01$  vs.  $p21^{-/-}$  2 wk), (right:  $n=10$ ;  $*P < 0.05$  vs.  $p21^{+/+}$  1 wk;  $*P < 0.05$  vs.  $p21^{+/+}$  2 wk). (C) The number of local apoptotic TUNEL positive cells after vascular injury was unchanged after treatment with AMD3100. (D) One week after vascular injury,  $p21^{-/-}$  mice treated with AMD3100 displayed marginally increased local vascular SDF-1 levels compared to control  $p21^{-/-}$

mice ( $n=5$ ;  $*P < 0.05$  vs. Co  $p21^{-/-}$ ). AMD3100 administration did not influence SDF-1 tissue levels in  $p21^{+/+}$  mice.



**Supplemental Table 1:** Peripheral blood cell analysis of  $p21^{+/+}$  and  $p21^{-/-}$  mice before and after wire injury. Blood was collected from non-injured mice (Co) and 1 week following wire injury and analyzed using a Cell-dyne 3500 hematology analyzer ( $n=3$ ).

|                             | $p21^{+/+}$    |                | $p21^{-/-}$    |                |
|-----------------------------|----------------|----------------|----------------|----------------|
|                             | Co             | 1 wk           | Co             | 1 wk           |
| Monocytes/mm <sup>3</sup>   | 191.6 ± 47.7   | 169.2 ± 45.7   | 233.8 ± 55.7   | 294 ± 94.7     |
| Monocytes (%)               | 4.8 ± 1.3      | 4.2 ± 1.2      | 5.9 ± 1.6      | 5.2 ± 1.5      |
| Neutrophils/mm <sup>3</sup> | 422.4 ± 108.9  | 1362.0 ± 250.0 | 664.6 ± 73.4   | 1656.0 ± 202.3 |
| Neutrophils (%)             | 10.4 ± 2.8     | 35.6 ± 6.7     | 16.3 ± 1.8     | 42.1 ± 5.9     |
| Lymphocytes/mm <sup>3</sup> | 2538.0 ± 348.8 | 3164.0 ± 130.9 | 2462.0 ± 277.2 | 2173.0 ± 243.3 |
| Lymphocytes (%)             | 61.8 ± 9.1     | 59.3 ± 6.9     | 76.8 ± 3.3     | 52.4 ± 5.6     |

## Supplemental Methods

### Primer Sequences:

mp21<sup>Cip1</sup>: forward 5'-GAC CTG GGA GGG GAC AAG AG-3'  
reverse 5'- TTC TCT TGC AGA AGA CCA ATC-3'

mp53: forward 5'-TGA GGT TCG TGT TTG TGC CTG-3'  
reverse 5'-GGT AGC TGG AGT GAG CCC TGC-3'

mSDF-1: forward 5'-ACA CTC CAA ACT GTG CCC TTC AGA-3'  
reverse 5'-ATG CTG GCA AAC CTT AGC ATG ACC-3'

18S: forward 5'-TTT CGG AAC TGA GGC CAT GA-3'  
reverse 5'-GCA AAT GCT TTC GCT CTG GTC-3'

### ChIP mSDF-1 promoter STAT3 binding site:

forward 5'-ACC TGT TTG GTC TCT TTG CTC GGT-3'  
reverse 5'-CTG TCA AAG GCA CAA GCC GTG AAA-3'

### $\beta$ -actin genomic control (ChIP):

forward 5'-TTT CCC TGA GCA GCT TGT CA-3'  
reverse 5'-CTG GGC CGT TAG CTA GTG TC-3'
